# Supplementary material for: Metabolomic profiling of plasma from middle-aged and advanced-age male mice reveals the metabolic abnormalities of carnitine biosynthesis in metallothionein gene knockout mice
Source: publisher site journal article supplement (doi:10.18632/aging.203731), 2021-12-01
Supplement: Supplementary file [file aging-v13i23-203731-supplementary-material-SD1.pdf]

## SUPPLEMENTARY FIGURES

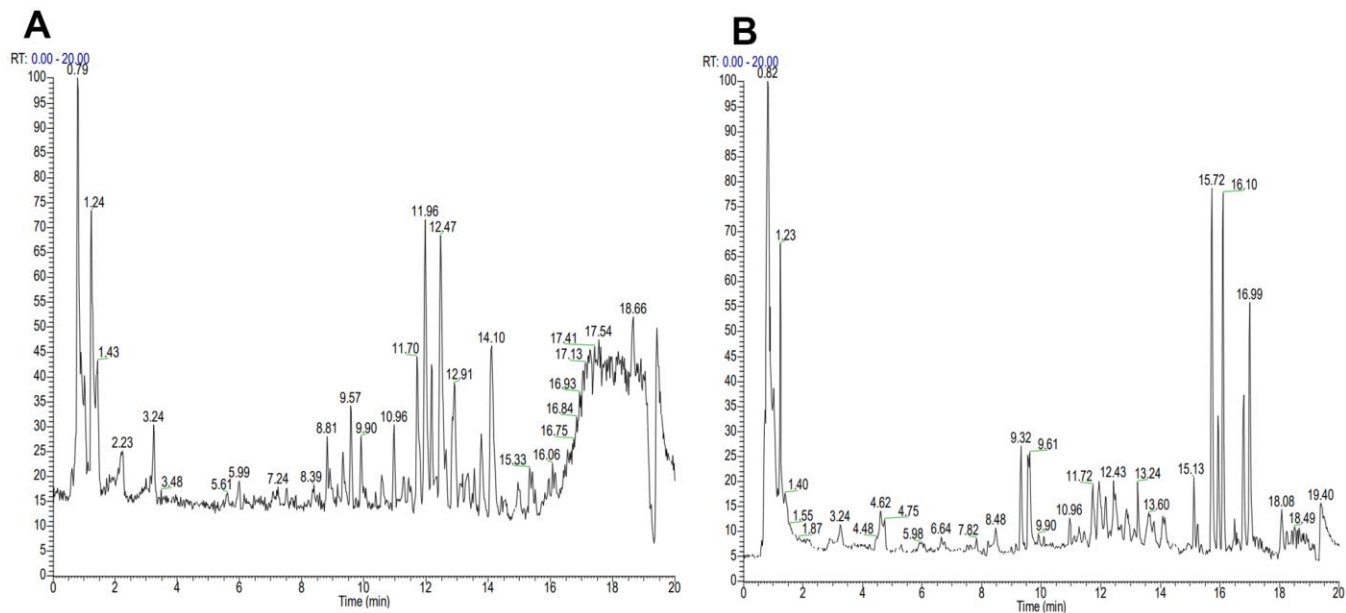

**Supplementary Figure 1. Base peak intensity (BPI) chromatograms obtained from mouse plasma in liquid chromatography mass spectrometry (LC-MS). (A) Positive (ESI<sup>+</sup>) scan mode, (B) negative (ESI<sup>-</sup>) scan mode.**

**A**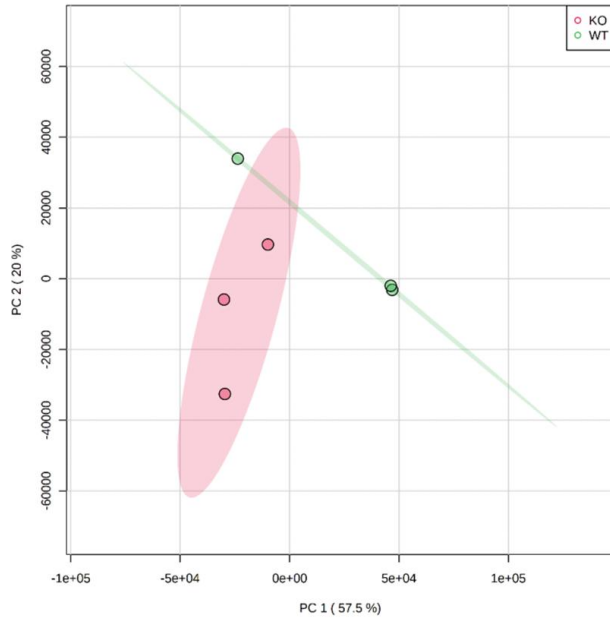**B**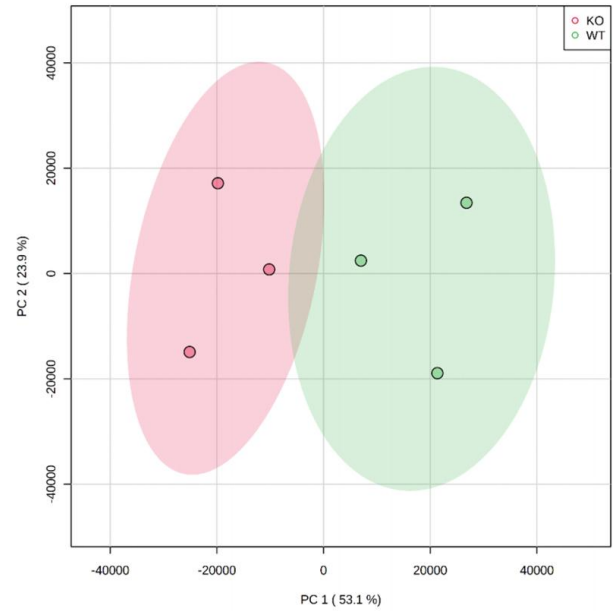**C**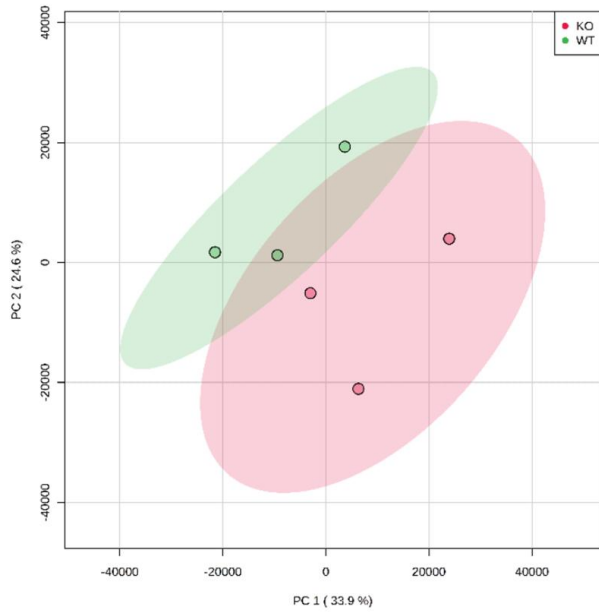**D**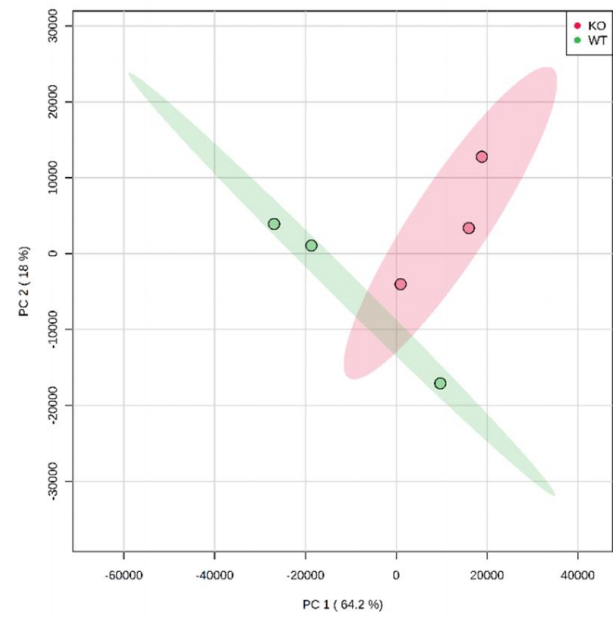

**Supplementary Figure 2. Score scatter plot of PCA model.** (A)  $ES1^+$  scan in 50-week-old mice; (B)  $ES1^-$  scan in 50-week-old mice; (C)  $ES1^+$  scan in 100-week-old mice; (D)  $ES1^-$  scan in 100-week-old mice. Magenta circles indicate MTKO mice and green circles indicate WT mice.

**A**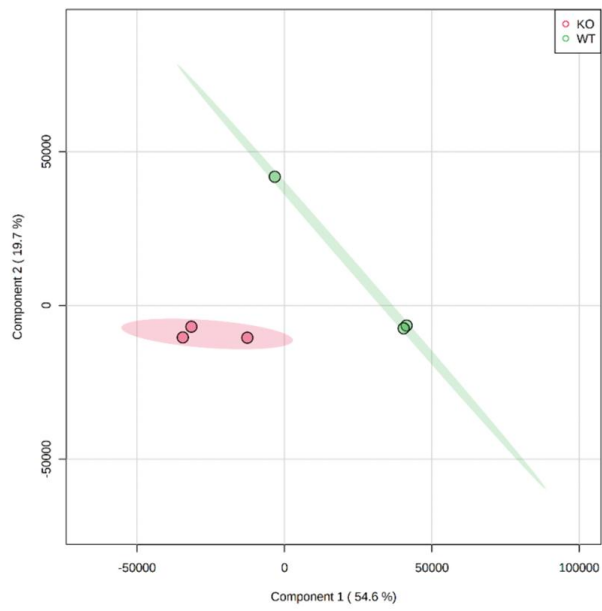**B**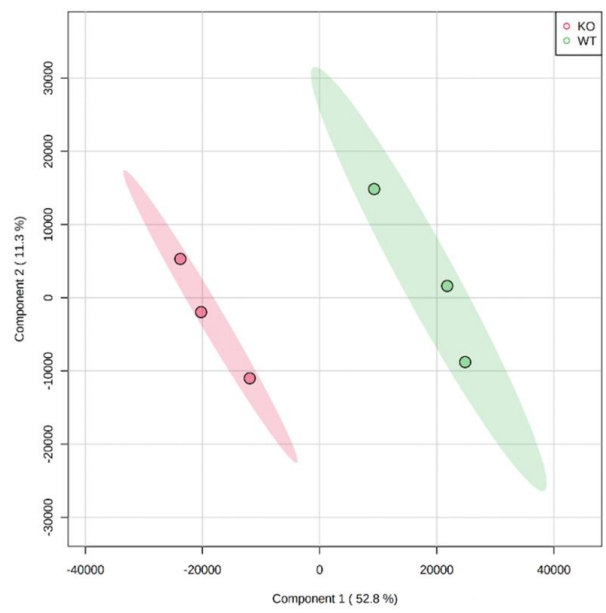**C**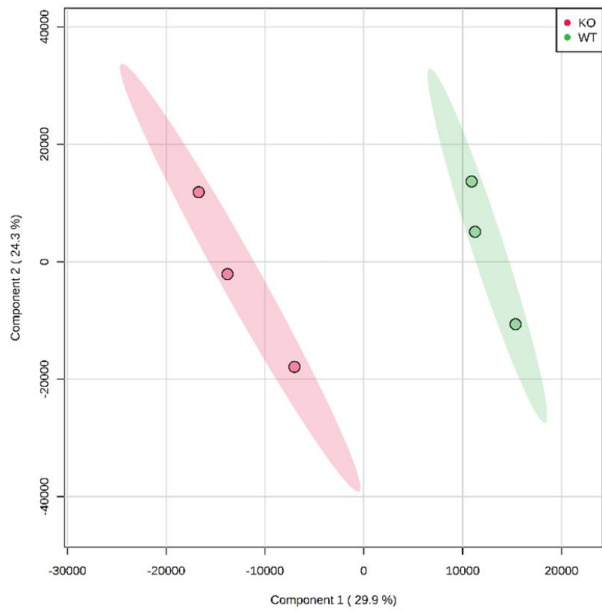**D**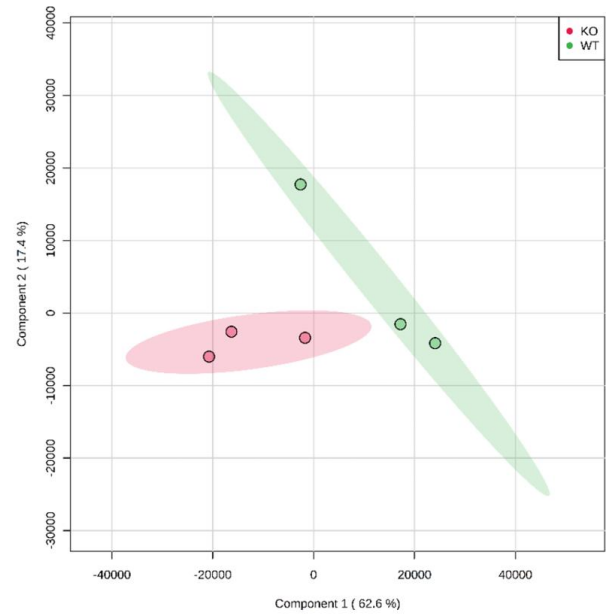

**Supplementary Figure 3. Score scatter plot of PLS-DA model.** (A)  $ESI^+$  scan in 50-week-old mice; (B)  $ESI^-$  scan in 50-week-old mice; (C)  $ESI^+$  scan in 100-week-old mice; (D)  $ESI^-$  scan in 100-week-old mice. Magenta circles indicate MTKO mice and green circles indicate WT mice.

**A**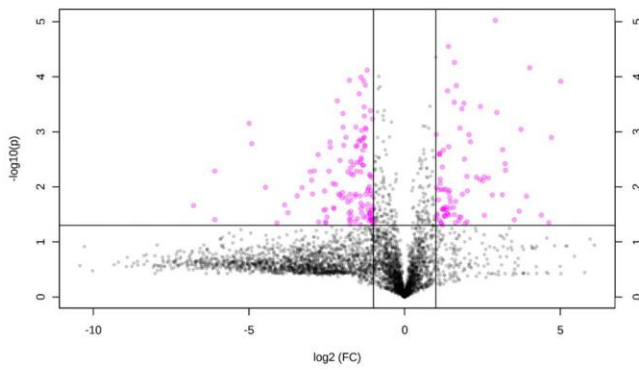**B**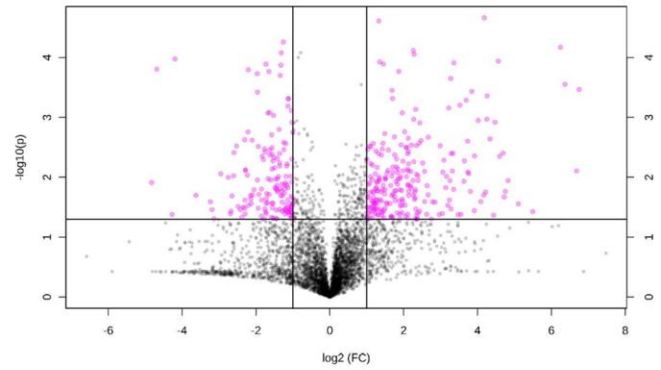**C**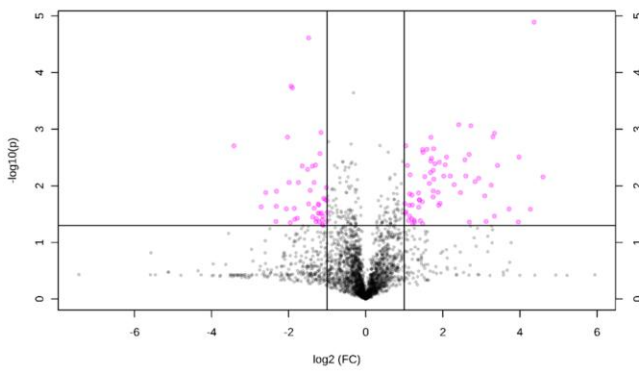**D**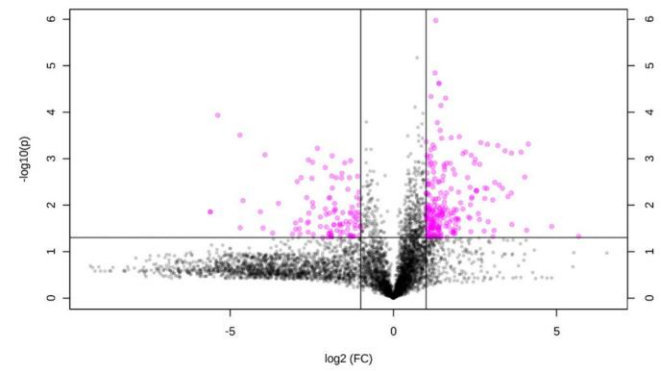

**Supplementary Figure 4. Volcano plot of data.** The ranges,  $Y > 1.30$  and  $X > 1$ , indicate a significant increase; the ranges,  $Y > 1.30$  and  $X < -1$ , indicate a significant decrease (magenta circles). **(A)** ESI<sup>+</sup> scan in 50-week-old mice; **(B)** ESI<sup>-</sup> scan in 50-week-old mice; **(C)** ESI<sup>+</sup> scan in 100-week-old mice; **(D)** ESI<sup>-</sup> scan in 100-week-old mice.

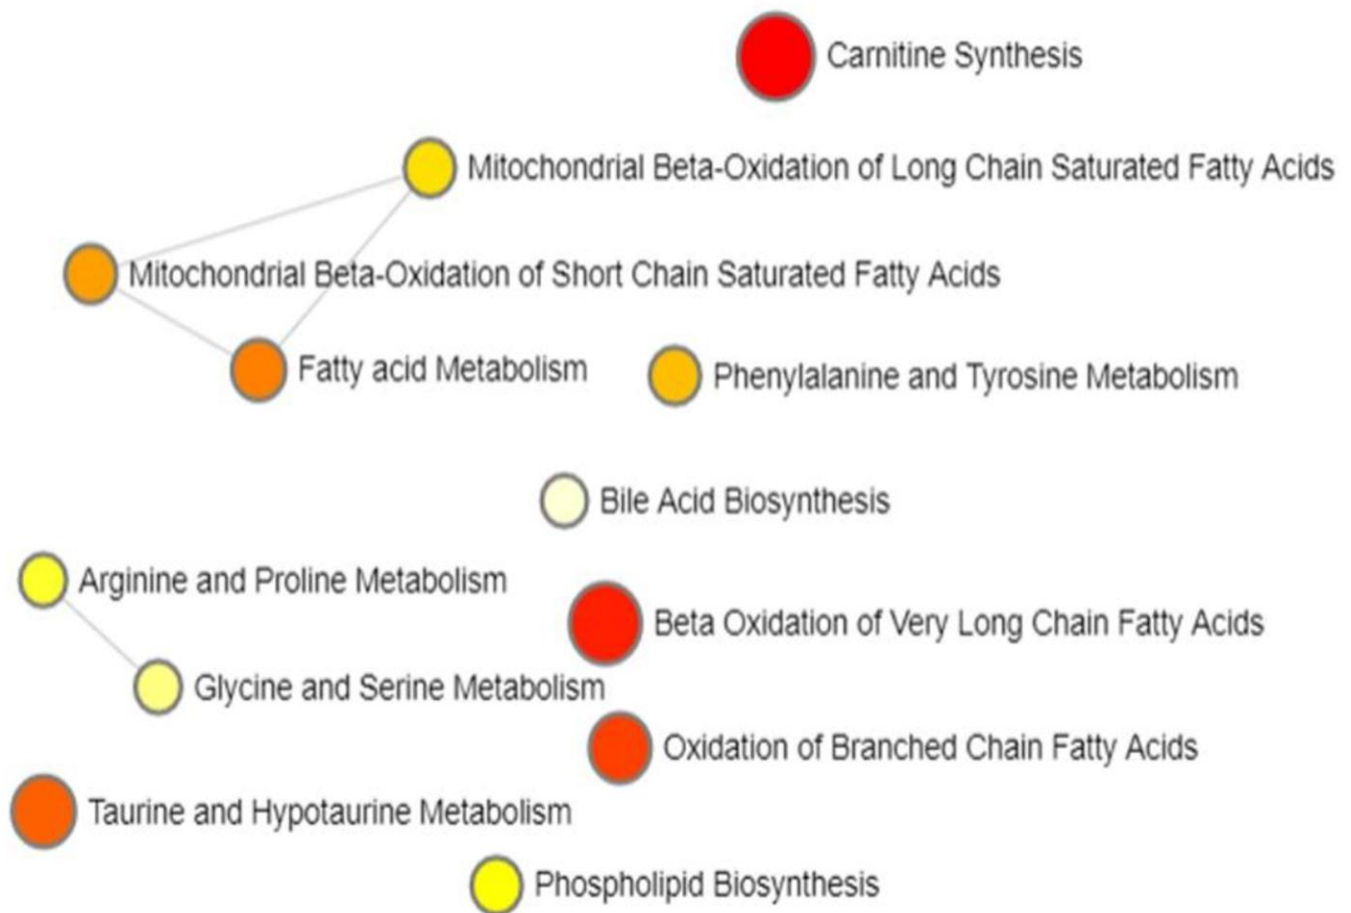

**Supplementary Figure 5. A correlation network diagram obtained from pathway enrichment analysis of perturbed metabolites in 100-week old MTKO mice in ESI<sup>+</sup> mode.** Each node denotes one different function, while more significant functions are indicated by a darker color.
